# Supplementary material for: PPARγ Variant Influences Angiographic Outcome and 10-Year Cardiovascular Risk in Male Symptomatic Coronary Artery Disease Patients
Source: Oxford University Press journal article supplement (doi:10.2337/dc08-1819), 2009-02-19
Supplement: dc081819-sup-online_appendix_table_a1.xls [file dc081819-sup-online_appendix_table_a1.xls]

## Sheet: Sheet1
Regieli JJ et al "A PPARγ Variant Influences Angiographic Outcome and Ten-Year Cardiovascular Risk in Male Symptomatic Coronary Artery Disease Patients"
Online Appendix Table A1
Multivariable regression models for 10-year cardiovascular outcomes and angiographical outcomes.
This table displays coefficients pertaining to the respective covariate in Model 1 and Model 2 (listed on the left).
For cardiovascular endpoints, eβ (Hazard Ratio) and 95% CI is listed, for angiographical endpoints (right side of the table), β (SE), p-value is listed.
† denotes statistical significance (p<0.05, also depicted in red), (-) denotes unable to estimate due to empty cell.
		Clinical Endpoints, eβ Hazard Ratios and 95% CI				Angiographical Endpoints, β(SE) and p-value
	covariate	Death due to IHD	IHD death or non-fatal MI	Death due to Vascular Disease	All cause Mortality	MOD baseline	MSD baseline	MOD follow up	MSD follow up
Model 1 correction for metabolic syndrome components	number of Ala copies	0.10 (0.14-0.72) †	0.46 (0.23-0.92) †	0.17 (0.04-0.67) †	0.57 (0.34-0.97) †	0.17 (0.06), p=0.002	0.11 (0.05), p=0.01	0.14 (0.06), p=0.01	0.08 (0.05), p=0.09
	pravastatin randomization group	0.61 (0.32-1.17)	0.68 (0.43-1.07)	0.52 (0.30-0.95) †	0.98 (0.66-1.45)	0.01 (0.05), p=0.86	0.01 (0.04), p=0.84	0.05 (0.05), p=0.37	0.05 (0.04), p=0.26
	glucose	1.21 (0.92-1.59)	1.20 (0.97-1.48)	1.21 (0.94-1.56)	1.10 (0.92-1.30)	-0.04 (0.03), p=0.14	-0.05 (0.02), p=0.04	-0.05 (0.03), p=0.07	-0.05 (0.02), p=0.02
	plasma TG	0.75 (0.47-1.20)	0.86 (0.62-1.20)	0.75 (0.50-1.15)	0.90 (0.68-1.20)	-0.01 (0.04), p=0.81	-0.02 (0.03), p=0.57	0.01 (0.04), p=0.90	-0.02 (0.03), p=0.59
	HDL	2.00 (0.47-8.44)	2.67 (0.96-7.43)	2.01 (0.54-7.50)	1.67 (0.69-4.05)	0.07 (0.12), p=0.55	0.08 (0.10), p=0.42	0.09 (0.12), p=0.48	0.09 (0.10), p=0.39
	history of hypertension	2.10 (1.04-4.14)	1.43 (0.86-2.38)	1.95 (10.4-3.67)	1.25 (0.79-1.98)	0.07 (0.06), p=0.24	0.02 (0.05), p=0.76	0.04 (0.06), p=0.56	-0.02 (0.05), p=0.74
	diastolic blood pressure	0.97 (0.93-1.00)	1.00 (0.98-1.04)	0.97 (0.94-1.00)	0.97 (0.95-0.99)	0.003 (0.003), p=0.37	0.004 (0.003), p=0.10	0.003 (0.003), p=0.32	0.004 (0.003), p=0.14
	systolic blood pressure	1.00 (0.98-1.02)	0.99 (0.98-1.01)	1.00 (0.99-1.02)	1.01 (1.00-1.02)	-0.001 (0.002), p=0.68	-0.002 (0.002), p=0.22	-0.001 (0.002), p=0.63	-0.002 (0.002), p=0.24
	BMI	1.10 (0.98-1.24)	1.04 (0.95-1.14)	1.09 (0.97-1.21)	1.00 (0.93-1.08)	-0.005 (0.01), p=0.62	0.03 (0.01), p=0.001	-0.01 (0.01), p=0.60	0.03 (0.01), p=0.001
	betablocker use	1.42 (0.70-3.10)	1.83 (1.00-3.34)	1.43 (0.71-2.88)	0.79 (0.51-1.22)	-0.03 (0.06), p=0.65	-0.05 (0.05), p=0.26	-0.03 (0.06), p=0.66	-0.05 (0.05), p=0.27
	CCB use	1.10 (0.56-2.01)	0.99 (0.62-1.58)	1.03 (0.58-1.84)	1.01 (0.68-1.50)	-0.01 (0.05), p=0.86	-0.09 (0.04), p=0.04	-0.01 (0.05), p=0.81	-0.10 (0.04), p=0.02
	ACE inhibitor use	1.15 (0.42-3.15)	1.06 (0.49-2.32)	1.37 (0.57-3.25)	1.04 (0.55-1.99)	-0.08 (0.09), p=0.94	0.03 (0.08), p=0.71	-0.06 (0.09), p=0.52	0.08 (0.08), p=0.26
	Diuretic use	0.96 (0.39-2.40)	0.89 (0.43-1.86)	0.92 (0.40-2.13)	1.10 (0.60-2.00)	0.007 (0.09), p=0.94	0.09 (0.07), p=0.23	0.002 (0.09), p=0.98	0.06 (0.07), p= 0.44
	Other antihypertensives use	0	1.87 (0.34-14.59)	0	0	0.10 (0.24), p=0.67	0.16 (0.20), p=0.41	0.10 (0.24), p=0.68	0.09 (0.19), p=0.66
	Antidiabetic use	1.45 (0.15-14.13)	0.71 (0.09-5.78)	1.12 (0.12-10.52)	2.10 (0.57-7.80)	-0.17 (0.25), p=0.51	-0.01 (0.23), p=0.96	-0.22 (0.26), p=0.38	-0.27 (0.23), p=0.24
Model 2 correction for ln(CRP)	number of Ala copies	(-)	0.28 (0.09-0.85) †	0.13 (0.018-0.92) †	0.63 (0.34-1.18)	0,25 (0.07),p=0.0002	0.19(0.06), p=0.001	0.22 (0.07), p=0.002	0,14 (0.06), p=0.02
	randomization group	(-)	0.28 (0.09-0.86)	0,59(0.30-1.18), p=0.14	0,89 (0,56-1,42), p=0.64	0.01 (0.06), p=0.84	-0.032(0.05), p=0.53	0.03(0.06),p=0.623	-0.004(0.05), p=0.93
	ln(CRP)	(-)	1.21 (0.97-1.51)	1.30 (0.99-1.70), p=0.06	1,22(1,01-1,48) †	-0.01 (0.02), p=0.70	0.023(0.02), p=0.27	-0.02 (0.02), p=0.37	0.017(0.02), p=0.40
